# Issues and Events

## ADA Events

16th Annual Endocrinology Seminar  
27 September 2012  
Crowne Plaza Hotel  
Cromwell, Connecticut  
Contact: Louise Butcher  
E-mail: [lbutcher@diabetes.org/aes](mailto:lbutcher@diabetes.org/aes)  
Web site: <http://professional.diabetes.org/>

Annual Diabetes Practice Update  
5 October 2012  
Oregon Convention Center  
Portland, Oregon  
Contact: Jessica Goodrich  
E-mail: [jgoodrich@diabetes.org](mailto:jgoodrich@diabetes.org)  
Web site: <http://professional.diabetes.org/adpu>

10th Professional Symposium on Diabetes  
13 October 2012  
Honolulu, Hawaii  
Contact: LJ Duenas  
E-mail: [lduenas@diabetes.org](mailto:lduenas@diabetes.org)  
Web site: <http://professional.diabetes.org/hawaii>

5th Disparities Partnership Forum  
22–23 October 2012  
Omni Shoreham Hotel  
Washington, DC  
Contact: Monique Lindsay  
E-mail: [mlindsay@diabetes.org](mailto:mlindsay@diabetes.org)  
Web site: <http://professional.diabetes.org/disparitiesforum>

38th Annual Diabetes Symposium  
27 October 2012  
Wichita Hyatt Regency  
Wichita, Kansas  
Contact: Patti Tasker  
E-mail: [ptasker@diabetes.org](mailto:ptasker@diabetes.org)  
Web site: <http://professional.diabetes.org/kansas>

Ohio CME Program  
1 November 2012  
Embassy Suites  
Independence, Ohio  
Contact: Joann Mraz  
E-mail: [jmraz@diabetes.org](mailto:jmraz@diabetes.org)  
Web site: <http://professional.diabetes.org/ohio>

43rd Annual Symposium for Healthcare Providers  
7 November 2012  
Crowne Plaza Hotel  
Cromwell, Connecticut  
Contact: Louise Butcher  
E-mail: [lbutcher@diabetes.org](mailto:lbutcher@diabetes.org)  
Web site: <http://professional.diabetes.org/ashcp>

1st American Diabetes Association Middle East Congress  
4–6 December 2012  
Dubai International Convention and Exhibition Centre  
Dubai, United Arab Emirates  
Web site: <http://ada-me.org/index.html>  
Contact for information: EDC, Center for Diabetes Education,  
3119 Trees of Avalon Parkway, McDonough, GA 30253.  
Tel: 678-759-1561. E-mail: [info@ada-me.org](mailto:info@ada-me.org)

60th Annual Advanced Postgraduate Course  
22–24 February 2013  
Hilton New York  
New York, New York  
Web site: <http://professional.diabetes.org/pg13>

73rd Scientific Sessions  
21–25 June 2013  
McCormick Place Convention Center  
Chicago, Illinois  
Web site: <http://scientificsessions.diabetes.org>

Contact for information on ADA events: American Diabetes Association, 1701 N. Beauregard St., Alexandria, VA 22311.  
Tel: 800-232-3472, select option 1. Fax: 703-549-1715 or 703-253-4358. E-mail: [professionaleducation@diabetes.org](mailto:professionaleducation@diabetes.org).  
Web site: <http://professional.diabetes.org/ce>.

## Other Events

2nd International Conference on Hyperphagia  
17–20 October 2012  
Pennington Biomedical Research Center  
Louisiana State University  
Baton Rouge, Louisiana  
Web site: [www.hyperphagia.org](http://www.hyperphagia.org)

3rd International Symposium on Adipobiology and Adipopharmacology (ISAA)  
25–27 October 2012  
Burgas, Bulgaria  
Abstract (2 double-spaced pages) submission deadline:  
25 August 2012  
Contact: George N. Chaldakov  
E-mail: [chaldakov@yahoo.com](mailto:chaldakov@yahoo.com)

4th World Congress on Controversies to Consensus in Diabetes, Obesity and Hypertension (CODHy)  
8–11 November 2012  
Barcelona, Spain  
Web site: <http://www.codhy.com/2012/>

The 2nd International Conference on Prehypertension and Cardio Metabolic Syndrome (PreHT 2013)  
31 January–3 February 2013  
Barcelona, Spain  
Web site: [www.prehypertension.org](http://www.prehypertension.org)
